# Supplementary material for: Data-driven prediction of continuous renal replacement therapy survival
Source: PubMed Central journal article supplement (PMC11211317; doi:10.1038/s41467-024-49763-3), 2024-06-27
Supplement: 41467_2024_49763_MOESM1_ESM.pdf [file 41467_2024_49763_MOESM1_ESM.pdf]

# Data-driven prediction of continuous renal replacement therapy survival

Davina Zamanzadeh<sup>1</sup>, Jeffrey Feng<sup>2</sup>, Panayiotis Petousis<sup>3</sup>,  
Arvind Vepa<sup>2</sup>, Majid Sarrafzadeh<sup>1</sup>, S Ananth Karumanchi<sup>4</sup>,  
Alex A. T. Bui<sup>2\*†</sup>, Ira Kurtz<sup>5†</sup>

<sup>1</sup>Department of Computer Science, University of California, Los Angeles, Log Angeles, 90095, California, United States.

<sup>2</sup>Medical & Imaging Informatics Group, University of California, Los Angeles, Los Angeles, 90095, California, United States.

<sup>3</sup>Clinical and Translation Science Institute, University of California, Los Angeles, Los Angeles, 90095, California, United States.

<sup>4</sup>Department of Medicine, Cedars-Sinai Medical Center, Los Angeles, 90048, California United States.

<sup>5</sup>Department of Medicine, David Geffen School of Medicine, University of California, Los Angeles, Los Angeles, 90095-1689, California, United States.

\*Corresponding author(s). E-mail(s): [buia@mii.ucla.edu](mailto:buia@mii.ucla.edu);

†These authors jointly supervised this work.

## Supplementary information

---

**Supplementary Algorithm 1** Train, tune, and evaluate a model to predict if a patient should be placed on [CRRT](#).

---

```
1:  $\mathbb{D}_{\text{train+val}} \leftarrow$  choose from {UCLA: CRRT, UCLA: Control, Cedars: CRRT }
2:  $\mathbb{D}_{\text{test}} \leftarrow$  choose from {UCLA: CRRT, UCLA: Control, Cedars: CRRT }
3: if  $\mathbb{D}_{\text{train+val}} = \mathbb{D}_{\text{test}}$  then
4:    $\mathbb{D}_{\text{train}}, \mathbb{D}_{\text{val}}, \mathbb{D}_{\text{test}} \leftarrow \mathbb{D}_{\text{train+val}} * [0.6, 0.2, 0.2]$   $\triangleright$  Split dataset into 60/20/20%
   respectively.
5: else
6:    $\mathbb{D}_{\text{train}}, \mathbb{D}_{\text{val}} \leftarrow \mathbb{D}_{\text{train+val}} * [0.8, 0.2]$   $\triangleright$  Split dataset into 80/20% respectively.
7: end if
8:  $w \leftarrow \{1, 2, 3, 4, 5, 6, 7, 10, 14\}$  days  $\triangleright$  look-back window size
9:  $m \leftarrow \{\text{lgbm, xgb, rf}\}$   $\triangleright$  model type
10:  $i \leftarrow \{\text{mean/mode, } k \text{ nearest neighbors}\}$   $\triangleright$  imputation method
11:  $f \leftarrow \{k \text{ best, correlation threshold}\}$   $\triangleright$  feature selection method
12:  $\mathbb{H} \leftarrow \{w, m, i, f\}$   $\triangleright$  Set hyperparameter grid
13: function TUNING( $\mathbb{H}, \mathbb{D}_{\text{train}}, \mathbb{D}_{\text{val}}$ )
14:   metrics  $\leftarrow \{\}$ 
15:   for  $w_j, m_j, i_j, f_j \in \mathbb{H}$  do
16:     Train  $m_j(f_j(i_j(\mathbb{D}_{\text{train}})))$ 
17:     metrics  $\stackrel{\dagger}{\leftarrow}$  Evaluate  $m_j(f_j(i_j(\mathbb{D}_{\text{val}})))$ 
18:   end for
19:    $m^* \leftarrow m_j$  such that corresponding metric is max/min (best)
20:   return  $m^*$ 
21: end function
22:  $m^* \leftarrow$  TUNING( $\mathbb{H}, \mathbb{D}_{\text{train}}, \mathbb{D}_{\text{val}}$ )
23: metrics  $\leftarrow$  Evaluate  $m^*(\mathbb{D}_{\text{test}})$ 
24: subpopulations  $\leftarrow$  (heart, liver, infection)  $\times$  (male, female, race)
25: for subpopulation in subpopulations do
26:   metrics by subpopulation  $\leftarrow$  Evaluate  $m^*(\mathbb{D}_{\text{test}} * \text{subpopulation})$ 
27: end for
```

---

**Supplementary Table 1** Optimal parameters (model, window before [CRRT](#) initiation, and feature selection correlation threshold) and number of features before and after training for all experiments. Feature selection with a correlation threshold was optimal for all experiments. Note that for each experiment, the feature counts correspond to the features that were available at the optimal window after hyperparameter tuning. The feature counts after training also correspond to the optimal feature selection method after hyperparameter tuning.

| Experiment                                                               | Model | Window (days) | Correlation threshold | Number of features before training |                             | Number of features after training |                             |
|--------------------------------------------------------------------------|-------|---------------|-----------------------|------------------------------------|-----------------------------|-----------------------------------|-----------------------------|
|                                                                          |       |               |                       | Raw features                       | Total features (engineered) | Raw features                      | Total features (engineered) |
| UCLA Model                                                               | lgb   | 4             | 0.065                 | 2302                               | 8529                        | 212                               | 235                         |
| Cedars Sinai Model                                                       | rf    | 14            | 0.045                 | 1287                               | 4103                        | 176                               | 239                         |
| UCLA + Cedars Sinai Model                                                | lgb   | 7             | 0.045                 | 2791                               | 10892                       | 173                               | 254                         |
| UCLA + Cedars Sinai + Control Model                                      | xgb   | 14            | 0.015                 | 3220                               | 12966                       | 810                               | 1143                        |
| UCLA Model, Feature Intersection of All Cohorts                          | xgb   | 5             | 0.055                 | 503                                | 794                         | 190                               | 220                         |
| UCLA Model, Feature Intersection of UCLA and Cedars Sinai                | xgb   | 4             | 0.04                  | 623                                | 906                         | 279                               | 353                         |
| Cedars Sinai Model, Feature Intersection of All Cohorts                  | rf    | 14            | 0.035                 | 556                                | 861                         | 231                               | 321                         |
| Cedars Sinai, Feature Intersection of UCLA and Cedars Sinai              | rf    | 14            | 0.015                 | 662                                | 971                         | 475                               | 685                         |
| UCLA + Cedars Sinai Model, Feature Intersection of All Cohorts           | lgb   | 6             | 0.01                  | 514                                | 810                         | 401                               | 621                         |
| UCLA + Cedars Sinai Model, Feature Intersection of UCLA and Cedars Sinai | lgb   | 7             | 0.035                 | 648                                | 952                         | 207                               | 248                         |
| UCLA + Cedars Sinai + Control Model, Feature Intersection of All Cohorts | xgb   | 14            | 0.03                  | 556                                | 861                         | 270                               | 377                         |

**Supplementary Table 2** Performance measured by **ROCAUC**, **PRAUC**, and Brier Score when applying models to subgroups of respective test sets. Subgroups were categorized by three types of ICUs, which captured the vast majority of **CRRT** patients: medical ICU, cardiac ICU, and surgical ICU. The types of ICU were obtained from the name of the department that delivered **CRRT**, which was provided for all patients within the **UCLA: CRRT** and Cedars: **CRRT** cohorts. Only patients who were treated in an ICU that was explicitly one of the three types were considered for analysis. Mixed ICUs were not considered. Other specialized units such as neuro-ICU were also not considered due to limitations in sample size. All test sets included patients who were on **CRRT** for up to seven days.

| Model              | Evaluation Dataset                | Subgroup     | Count positive | (% AUROC (95% CI) | PRAUC (95% CI)   | Brier Score (95% CI) |
|--------------------|-----------------------------------|--------------|----------------|-------------------|------------------|----------------------|
| UCLA Model         | Holdout Test                      | All          | 425 (52.2%)    | 0.84 (0.80-0.87)  | 0.86 (0.82-0.90) | 0.17 (0.15-0.18)     |
|                    |                                   | Cardiac ICU  | 35 (48.6%)     | 0.91 (0.79-1.00)  | 0.93 (0.83-1.00) | 0.13 (0.08-0.18)     |
|                    |                                   | Medical ICU  | 124 (46.0%)    | 0.85 (0.78-0.91)  | 0.81 (0.69-0.91) | 0.16 (0.13-0.20)     |
|                    |                                   | Surgical ICU | 212 (61.3%)    | 0.82 (0.76-0.87)  | 0.89 (0.85-0.93) | 0.17 (0.14-0.20)     |
|                    | External Validation               | All          | 1788 (51.6%)   | 0.63 (0.61-0.66)  | 0.64 (0.60-0.67) | 0.24 (0.24-0.25)     |
|                    |                                   | Cardiac ICU  | 515 (50.1%)    | 0.61 (0.56-0.65)  | 0.63 (0.56-0.69) | 0.24 (0.23-0.25)     |
|                    |                                   | Medical ICU  | 531 (41.2%)    | 0.59 (0.54-0.65)  | 0.51 (0.45-0.58) | 0.24 (0.22-0.25)     |
|                    |                                   | Surgical ICU | 509 (66.6%)    | 0.66 (0.61-0.71)  | 0.77 (0.73-0.83) | 0.25 (0.24-0.26)     |
| Cedars Model       | Holdout Test                      | All          | 366 (54.6%)    | 0.78 (0.73-0.83)  | 0.81 (0.76-0.86) | 0.19 (0.18-0.21)     |
|                    |                                   | Cardiac ICU  | 101 (61.4%)    | 0.79 (0.69-0.87)  | 0.86 (0.77-0.93) | 0.20 (0.17-0.22)     |
|                    |                                   | Medical ICU  | 113 (43.4%)    | 0.74 (0.64-0.83)  | 0.70 (0.56-0.83) | 0.21 (0.18-0.23)     |
|                    |                                   | Surgical ICU | 103 (66.0%)    | 0.75 (0.65-0.84)  | 0.86 (0.79-0.93) | 0.19 (0.16-0.22)     |
|                    | External Validation               | All          | 2149 (51.8%)   | 0.58 (0.56-0.61)  | 0.60 (0.57-0.63) | 0.25 (0.24-0.25)     |
|                    |                                   | Cardiac ICU  | 159 (50.9%)    | 0.60 (0.52-0.69)  | 0.62 (0.51-0.73) | 0.25 (0.22-0.27)     |
|                    |                                   | Medical ICU  | 605 (42.6%)    | 0.55 (0.51-0.60)  | 0.47 (0.41-0.53) | 0.26 (0.25-0.27)     |
|                    |                                   | Surgical ICU | 1093 (62.5%)   | 0.58 (0.55-0.62)  | 0.69 (0.65-0.73) | 0.23 (0.23-0.24)     |
| UCLA+ Cedars Model | Holdout Test                      | All          | 785 (52.7%)    | 0.82 (0.79-0.85)  | 0.84 (0.81-0.87) | 0.17 (0.16-0.19)     |
|                    |                                   | Cardiac ICU  | 145 (53.1%)    | 0.78 (0.70-0.85)  | 0.80 (0.71-0.88) | 0.19 (0.17-0.22)     |
|                    |                                   | Medical ICU  | 208 (36.5%)    | 0.78 (0.72-0.84)  | 0.67 (0.56-0.77) | 0.19 (0.17-0.22)     |
|                    |                                   | Surgical ICU | 328 (66.5%)    | 0.85 (0.81-0.89)  | 0.92 (0.89-0.95) | 0.15 (0.14-0.17)     |
|                    | Holdout Test Stratified by UCLA   | All          | 418 (52.9%)    | 0.85 (0.82-0.89)  | 0.87 (0.83-0.91) | 0.16 (0.14-0.17)     |
|                    |                                   | Cardiac ICU  | 33 (48.5%)     | 0.76 (0.58-0.92)  | 0.81 (0.63-0.94) | 0.20 (0.15-0.25)     |
|                    |                                   | Medical ICU  | 117 (35.0%)    | 0.83 (0.75-0.90)  | 0.70 (0.55-0.82) | 0.18 (0.14-0.21)     |
|                    |                                   | Surgical ICU | 213 (68.1%)    | 0.88 (0.83-0.92)  | 0.94 (0.91-0.96) | 0.14 (0.12-0.16)     |
|                    | Holdout Test Stratified by Cedars | All          | 367 (52.6%)    | 0.78 (0.73-0.82)  | 0.80 (0.74-0.85) | 0.19 (0.18-0.21)     |
|                    |                                   | Cardiac ICU  | 112 (54.5%)    | 0.79 (0.70-0.87)  | 0.81 (0.70-0.89) | 0.19 (0.16-0.22)     |
|                    |                                   | Medical ICU  | 91 (38.5%)     | 0.72 (0.60-0.82)  | 0.65 (0.48-0.79) | 0.21 (0.18-0.24)     |
|                    |                                   | Surgical ICU | 115 (63.5%)    | 0.80 (0.71-0.88)  | 0.88 (0.80-0.94) | 0.18 (0.16-0.21)     |
| All Datasets Model | Holdout Test                      | All          | 991 (38.7%)    | 0.85 (0.82-0.87)  | 0.78 (0.74-0.82) | 0.15 (0.14-0.17)     |
|                    |                                   | Cardiac ICU  | 147 (51.7%)    | 0.81 (0.74-0.88)  | 0.83 (0.75-0.90) | 0.18 (0.15-0.22)     |
|                    |                                   | Medical ICU  | 228 (40.4%)    | 0.71 (0.64-0.77)  | 0.67 (0.58-0.74) | 0.22 (0.19-0.25)     |
|                    |                                   | Surgical ICU | 297 (62.0%)    | 0.79 (0.74-0.84)  | 0.85 (0.80-0.90) | 0.19 (0.16-0.21)     |
|                    | Holdout Test Stratified by UCLA   | All          | 429 (50.8%)    | 0.77 (0.73-0.81)  | 0.79 (0.74-0.83) | 0.20 (0.18-0.22)     |
|                    |                                   | Cardiac ICU  | 38 (55.3%)     | 0.69 (0.52-0.85)  | 0.77 (0.60-0.91) | 0.25 (0.17-0.33)     |
|                    |                                   | Medical ICU  | 132 (40.2%)    | 0.75 (0.67-0.83)  | 0.72 (0.60-0.82) | 0.20 (0.16-0.24)     |
|                    |                                   | Surgical ICU | 212 (61.3%)    | 0.78 (0.72-0.84)  | 0.85 (0.79-0.90) | 0.20 (0.17-0.23)     |
|                    | Holdout Test Stratified by Cedars | All          | 340 (48.8%)    | 0.79 (0.74-0.84)  | 0.78 (0.71-0.84) | 0.19 (0.16-0.21)     |
|                    |                                   | Cardiac ICU  | 109 (50.5%)    | 0.86 (0.78-0.93)  | 0.87 (0.77-0.94) | 0.15 (0.12-0.19)     |
|                    |                                   | Medical ICU  | 96 (40.6%)     | 0.63 (0.51-0.73)  | 0.57 (0.42-0.71) | 0.24 (0.20-0.28)     |
|                    |                                   | Surgical ICU | 85 (63.5%)     | 0.83 (0.72-0.92)  | 0.86 (0.74-0.96) | 0.16 (0.12-0.21)     |

**Supplementary Table 3** Breakdown of Statistical Tests Used  
Based on Feature Characteristics

|             | Variable Type             | Statistical Test Name | Effect Size Formula |
|-------------|---------------------------|-----------------------|---------------------|
| Continuous  | $X \sim \mathcal{N}^1$    | $t$ test              | Hedges $g$          |
|             | $x \approx \mathcal{N}^1$ | Mann-Whitney $U$ test |                     |
| Categorical | Binary                    | Fisher's Exact test   | Cohen's $h$         |
|             | Multicategory             | $\chi^2$ test         | Cramer's $v$        |

<sup>1</sup> $\mathcal{N}$  indicates the Normal or Gaussian distribution.

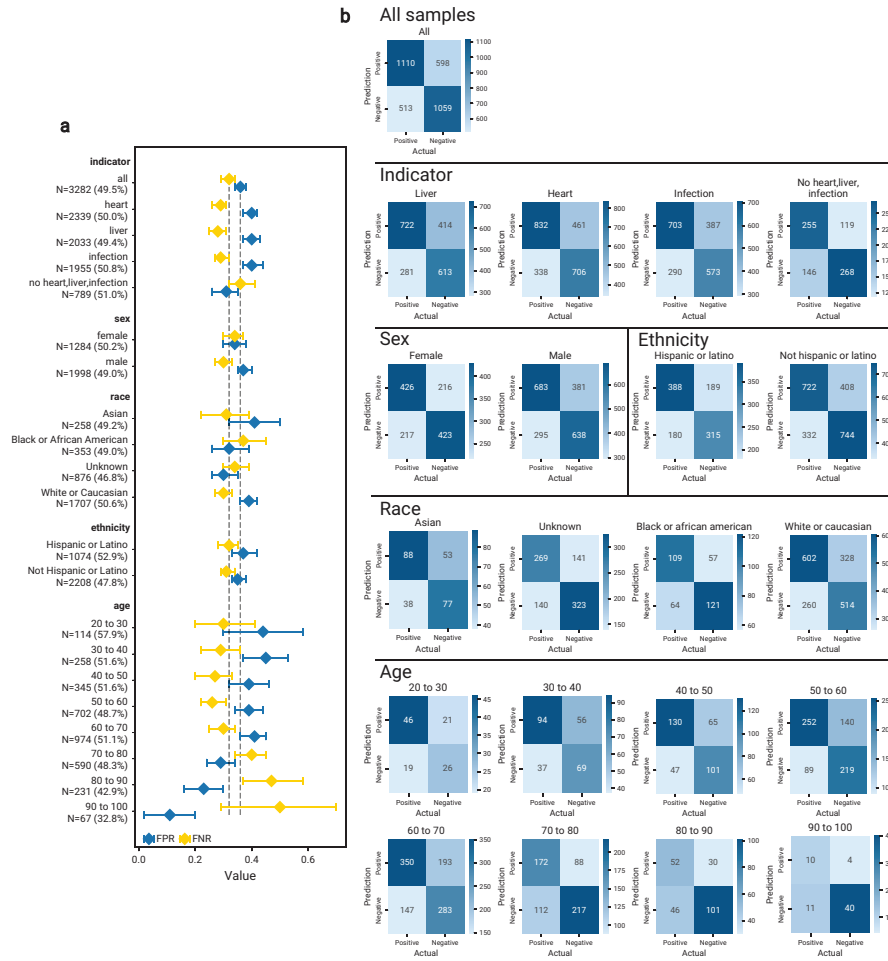

**Supplementary Fig. 1** Bias analysis for the model trained and evaluated on a combination of the [UCLA: CRRT](#), [Cedars: CRRT](#), and [UCLA: Control](#) cohorts, using only features that existed across all three cohorts (defined in Section 2.2). a) False positive rate (blue) and false negative rates (yellow) are reported for a holdout test set ( $N = 3,282$ ) including patients who were on [CRRT](#) for more than seven days. False positive rates and false negative rates are also reported when applying the model to subgroups of the test set. Subgroups were categorized by disease indicator, sex, race, ethnicity, and age. The reported statistics include point estimates as well as 95% confidence intervals obtained from 1,000 bootstrap iterations of the test dataset. b) Confusion matrices at a decision threshold of 0.5 when applying the model to same subgroups of the test set. Source data are provided as a Source Data file.

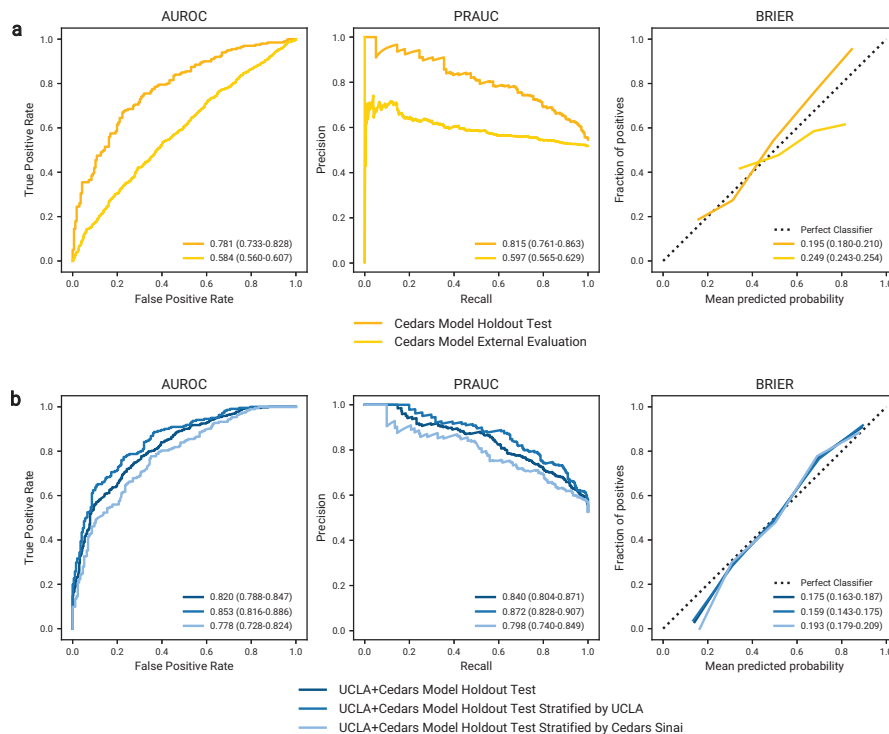

**Supplementary Fig. 2** Model performance when predicting CRRT patient outcomes. The first column illustrates receiver operating characteristic curves for the prediction of CRRT outcome, with AUROC as the summarizing metric. The second column illustrates precision curves for the prediction of CRRT outcome, with PRAUC as the summarizing metric. The third column illustrates calibration curves for the prediction of CRRT outcome, with the Brier score as the summarizing metric. The reported statistics include point estimates as well as 95% confidence intervals obtained from 1,000 bootstrap iterations of the test dataset. a) The performance of a model trained on single-institution data from Cedars: CRRT ( $N = 1,073$ ), evaluated on both an internal holdout test dataset ( $N = 366$ ) shown in darker yellow, and an external dataset from UCLA: CRRT ( $N = 2,149$ ) shown in lighter yellow. b) Performance of a model on the holdout test dataset ( $N = 785$ ) after training on a combination of UCLA: CRRT and Cedars: CRRT cohorts ( $N = 2,354$ ). The darkest blue curve illustrates the overall performance on the holdout test set, while the lighter and lightest blue curves illustrate the stratified results on the UCLA: CRRT ( $N = 418$ ) and Cedars: CRRT ( $N = 367$ ) constituents of the test dataset. Source data are provided as a Source Data file.

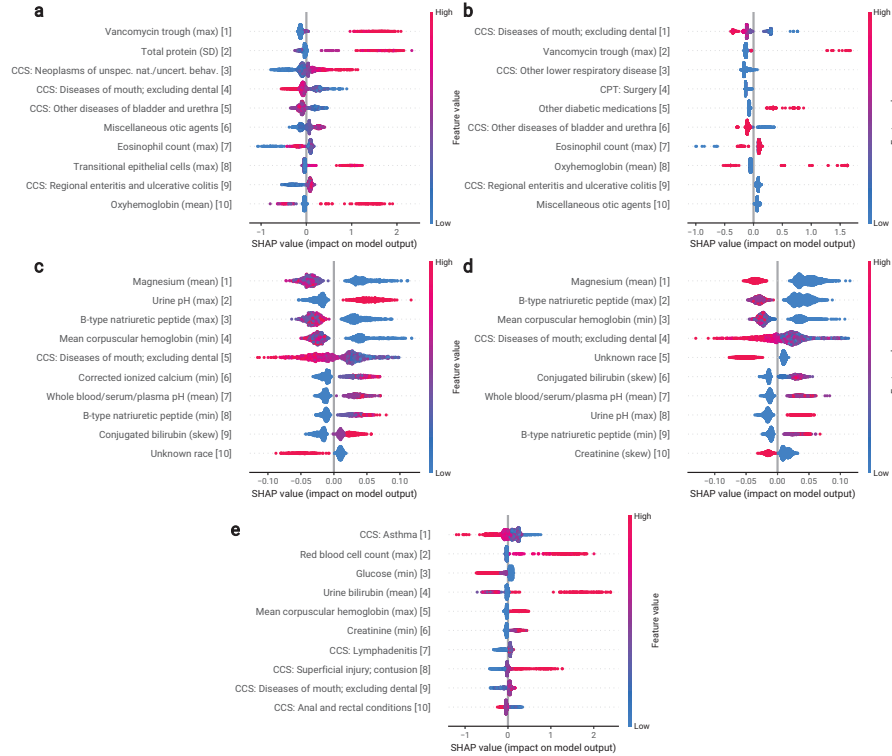

**Supplementary Fig. 3** Ordered ranking of the ten most important features by average magnitude of SHAP values and direction of influence on output predictions. SHAP values were evaluated using holdout test sets that included patients who were on CRRT for more than seven days. Red indicates that a higher feature value has the corresponding impact, as indicated by the x-axis, on model output. Blue indicates the impact of lower feature values on model output. a) Model trained on data from UCLA: CRRT ( $N = 1,268$ ), and evaluated on a holdout test set ( $N = 1,746$ ). b) Model trained on data from UCLA: CRRT ( $N = 1,268$ ), and evaluated on an external test set from Cedars: CRRT ( $N = 2,867$ ). c) Model trained on data from Cedars: CRRT ( $N = 1,073$ ), and evaluated on a holdout test set ( $N = 1,316$ ). d) Model trained on data from Cedars: CRRT ( $N = 1,073$ ), and evaluated on an external test set from UCLA: CRRT ( $N = 3,698$ ). e) Model trained on a combination of data from UCLA: CRRT and Cedars: CRRT ( $N = 2,354$ ), and evaluated on a holdout test set ( $N = 3,092$ ).



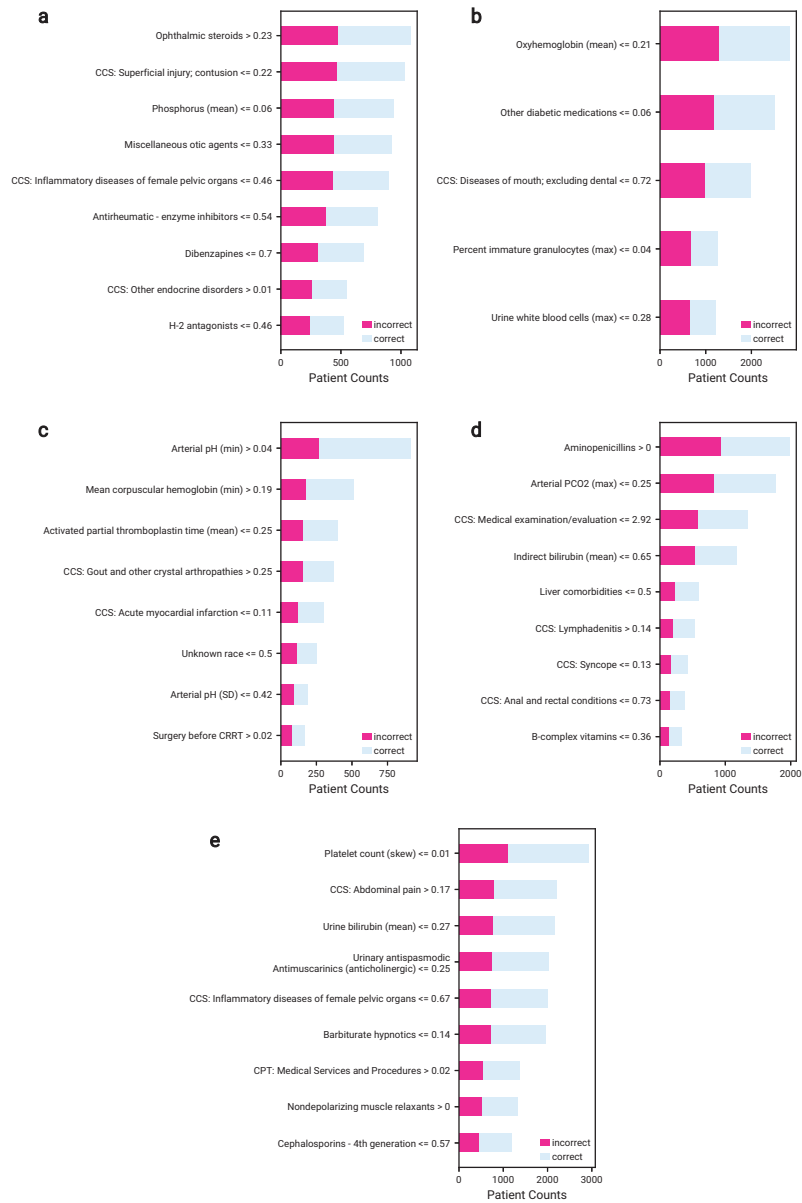

**Supplementary Fig. 4** Top features that contributed to the majority of the errors. The threshold applied at each row operated on the resulting population after applying the respective threshold in the immediately above row. Pink indicates the number of incorrectly classified samples as a result of the decision threshold, while blue indicates the number of correctly classified samples. We performed error analysis on holdout test sets that included patients who were on CRRT for more than seven days. a) Model trained on data from [UCLA: CRRT](#) ( $N = 1,268$ ), and evaluated on a holdout test set ( $N = 1,746$ ). b) Model trained on data from [UCLA: CRRT](#) ( $N = 1,268$ ), and evaluated on an external test set from [Cedars: CRRT](#) ( $N = 2,867$ ). c) Model trained on data from [Cedars: CRRT](#) ( $N = 1,073$ ), and evaluated on a holdout test set ( $N = 1,316$ ). d) Model trained on data from [Cedars: CRRT](#) ( $N = 1,073$ ), and evaluated on an external test set from [UCLA: CRRT](#) ( $N = 3,698$ ). e) Model trained on a combination of data from [UCLA: CRRT](#) and [Cedars: CRRT](#) ( $N = 2,354$ ), and evaluated on a holdout test set ( $N = 3,092$ ). Source data are provided as a Source Data file.

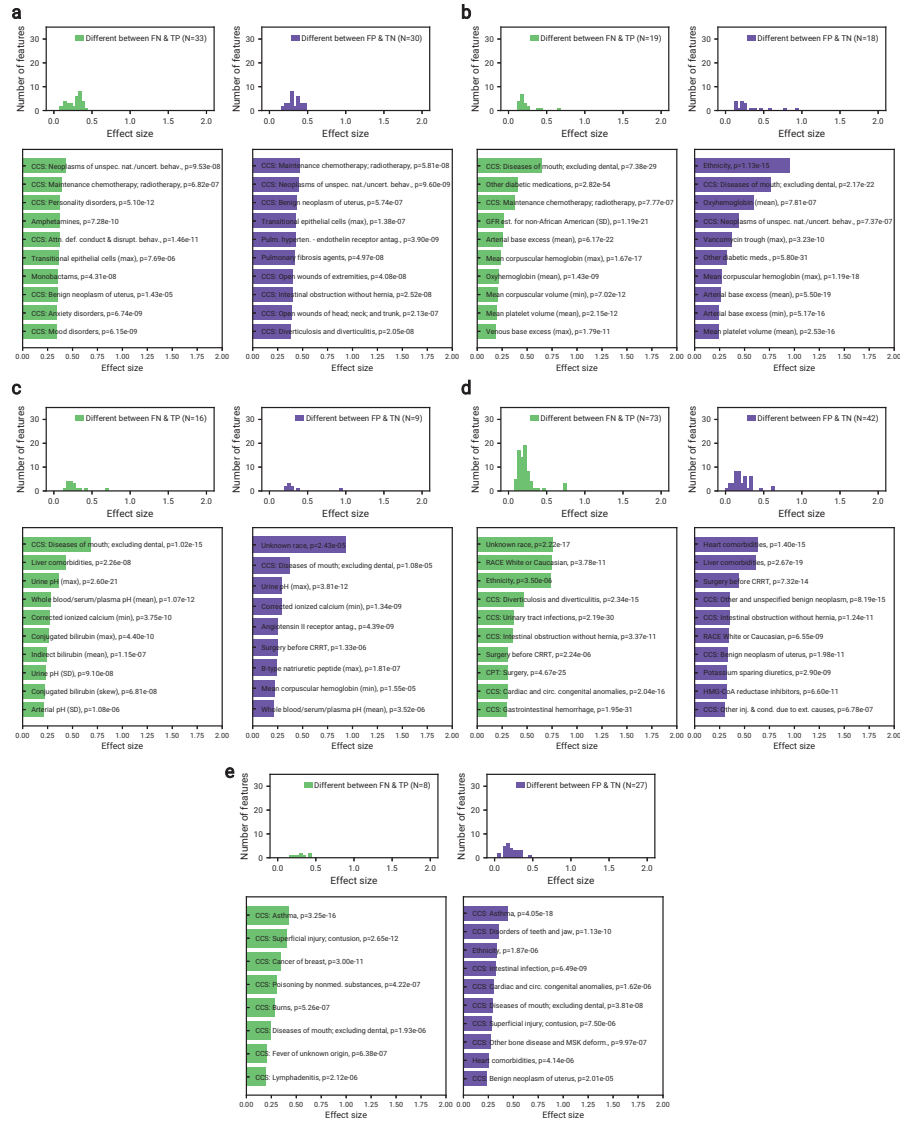

**Supplementary Fig. 5** Summary of analysis of model randomness against feature noise. Effect sizes are shown for the features that were significantly different between false negative and true positive populations (green). Effect sizes are also shown for the features that were significantly different between false positive and true negative populations (purple). Features with the top ten effect sizes are shown. We performed analysis on holdout test sets that included patients who were on **CRRT** for more than seven days. Details of statistical test are described in 4.8. a) Model trained on data from **UCLA: CRRT** ( $N = 1,268$ ), and evaluated on a holdout test set ( $N = 1,746$ ). b) Model trained on data from **UCLA: CRRT** ( $N = 1,268$ ), and evaluated on an external test set from Cedars: **CRRT** ( $N = 2,867$ ). c) Model trained on data from Cedars: **CRRT** ( $N = 1,073$ ), and evaluated on a holdout test set ( $N = 1,316$ ). d) Model trained on data from Cedars: **CRRT** ( $N = 1,073$ ), and evaluated on an external test set from **UCLA: CRRT** ( $N = 3,698$ ). e) Model trained on a combination of data from **UCLA: CRRT** and Cedars: **CRRT** ( $N = 2,354$ ), and evaluated on a holdout test set ( $N = 3,092$ ). Source data are provided as a Source Data file.

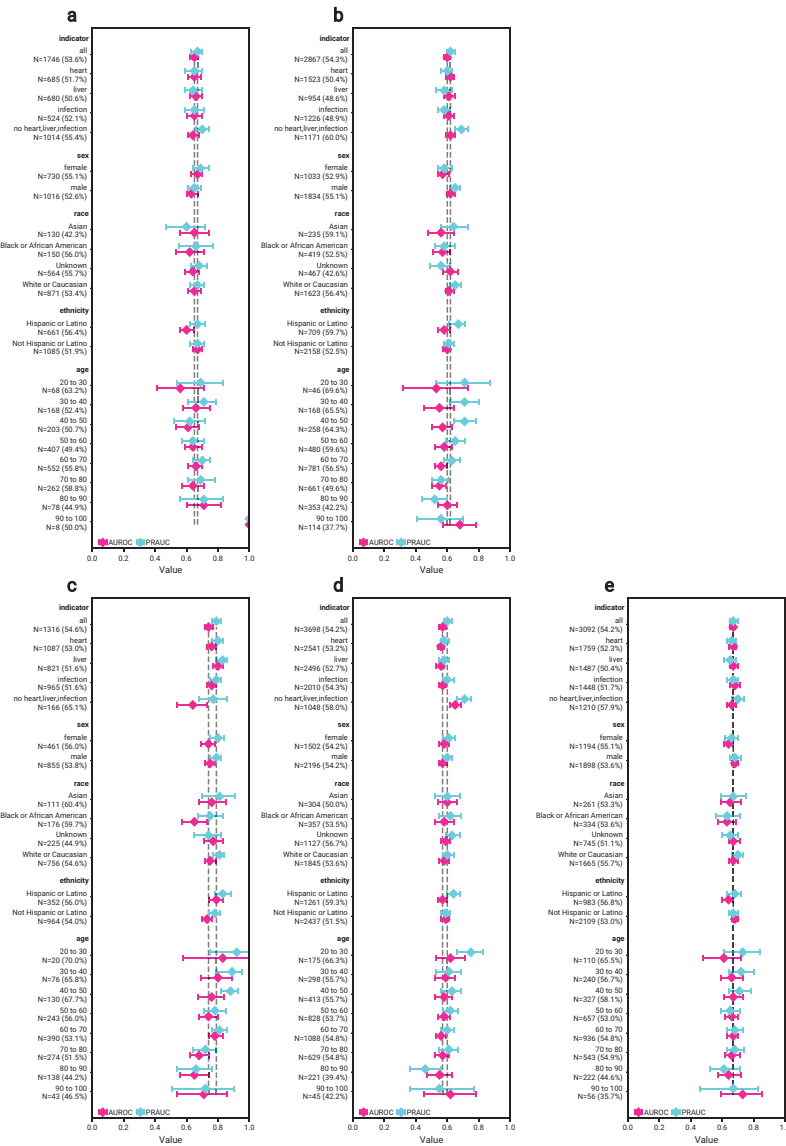

**Supplementary Fig. 6** Performance measured by **AUROC** (pink) and **PRAUC** (blue) when applying models to subgroups of respective test sets. Subgroups were categorized by disease indicator, sex, race, ethnicity, and age. All test sets included patients who were on **CRRT** for more than seven days. Reported statistics include point estimates as well as 95% confidence intervals obtained from 1,000 bootstrap iterations of the test dataset. a) Performance after training on data from **UCLA: CRRT** ( $N = 1,268$ ), and evaluating on a holdout test set ( $N = 1,746$ ). b) Performance after training on data from **UCLA: CRRT** ( $N = 1,268$ ), and evaluating on an external test set from Cedars: **CRRT** ( $N = 2,867$ ). c) Performance after training on data from Cedars: **CRRT** ( $N = 1,073$ ), and evaluating on a holdout test set ( $N = 1,316$ ). d) Performance after training on data from Cedars: **CRRT** ( $N = 1,073$ ), and evaluating on an external test set from **UCLA: CRRT** ( $N = 3,698$ ). e) Performance after training on a combination of data from **UCLA: CRRT** and Cedars: **CRRT** ( $N = 2,354$ ), and evaluating on a holdout test set ( $N = 3,092$ ). Source data are provided as a Source Data file.

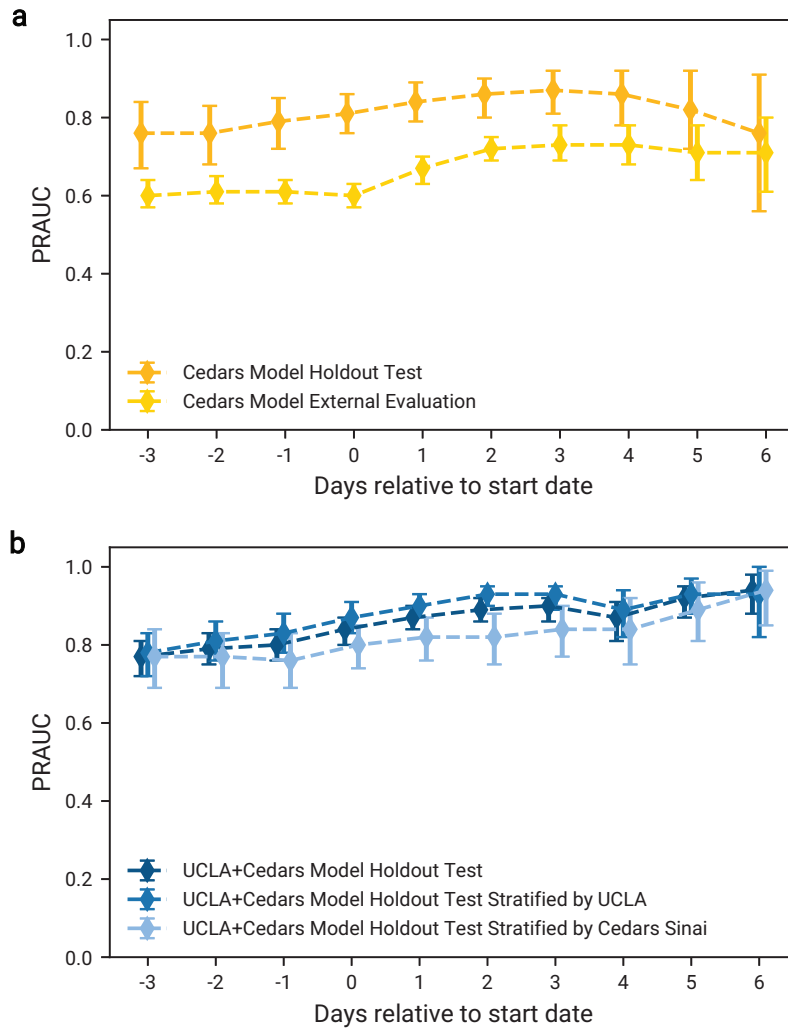

**Supplementary Fig. 7** Model evaluation when using features from shifted windows between three days before and six days after the start date. All test sets were limited to patients who were on **CRRT** for within seven days. Reported statistics include **PRAUC** as well as 95% confidence intervals obtained from 1,000 bootstrap iterations of the test dataset. a) Model trained on data from Cedars: **CRRT** ( $N = 1,073$ ), evaluated on both an internal holdout test dataset ( $N = 366$ ) shown in darker yellow, and an external dataset from Cedars: **CRRT** ( $N = 2,149$ ) shown in lighter yellow. b) Model trained on a combination of data from **UCLA: CRRT** and Cedars: **CRRT** ( $N = 2,354$ ). The darkest blue curve illustrates the overall performance on the holdout test set ( $N = 785$ ), while the lighter and lightest blue curves illustrate the stratified results on the **UCLA: CRRT** ( $N = 418$ ) and Cedars: **CRRT** ( $N = 367$ ) constituents of the test dataset. Source data are provided as a Source Data file.

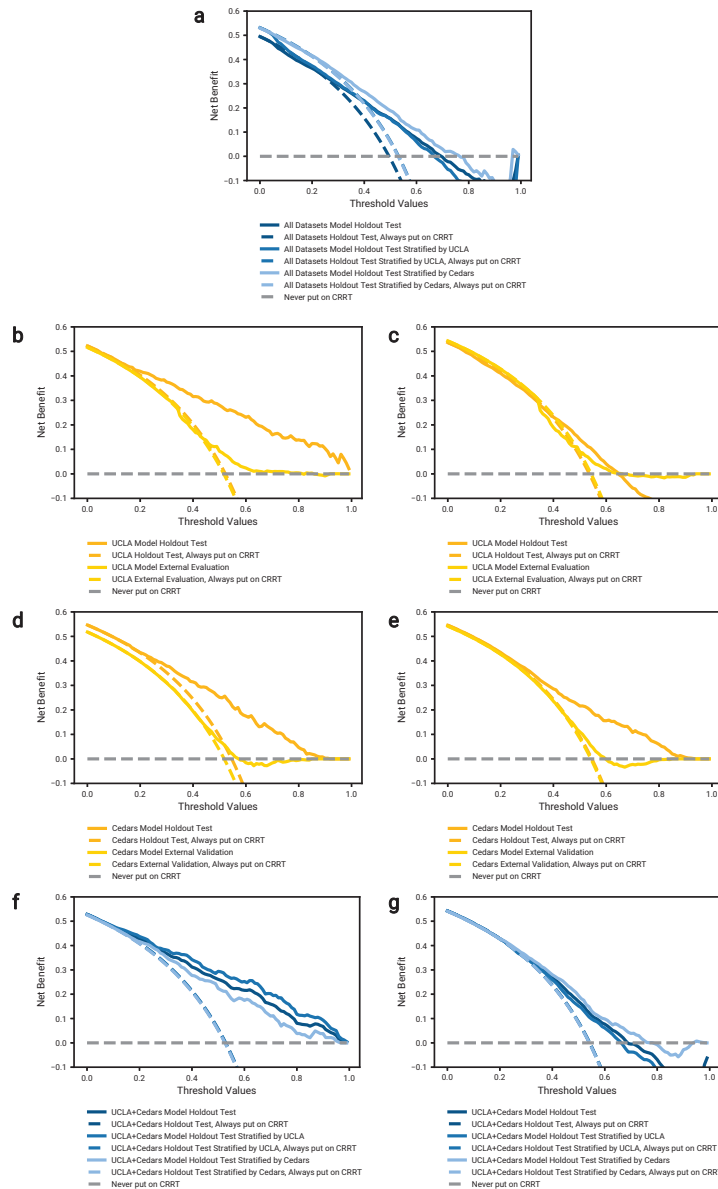

**Supplementary Fig. 8** Decision curve analysis illustrating net benefit at different operating thresholds. a) Model trained on a combination of data from [UCLA: CRRT](#), [Cedars: CRRT](#), and [UCLA: Control](#), and evaluated on a holdout test set including patients who were on [CRRT](#) for more than seven days ( $N = 3,382$ ). b) Model trained on data from [UCLA: CRRT](#) ( $N = 1,268$ ), and evaluated on a holdout test set ( $N = 425$ ) and an external test set from [Cedars: CRRT](#) ( $N = 1,788$ ). c) Same model as (b), but the test set included patients who were on [CRRT](#) for more than seven days ( $N = 1,746$  and  $N = 2,867$ , respectively). d) Model trained on data from [Cedars: CRRT](#) ( $N = 1,073$ ), and evaluated on a holdout test set ( $N = 366$ ) and an external test set from [UCLA: CRRT](#) ( $N = 2,149$ ). e) Same model as (c), but the test set included patients who were on [CRRT](#) for more than seven days ( $N = 1,316$  and  $N = 3,698$ , respectively). f) Model trained on a combination of data from [UCLA: CRRT](#) and [Cedars: CRRT](#) ( $N = 2,354$ ), and evaluated on a holdout test set ( $N = 785$ ). g) Same model as (f), but the test set included patients who were on [CRRT](#) for more than seven days ( $N = 3,092$ ). Source data are provided as a Source Data file.
